# Supplementary material for: The Influence of Ionic and Nonionic Surfactants on the Colloidal Stability and Removal of CuO Nanoparticles from Water by Chemical Coagulation
Source: PubMed Central journal article supplement (PMC6479800; doi:10.3390/ijerph16071260), 2019-04-09
Supplement: ijerph-16-01260-s001.pdf [file ijerph-16-01260-s001.pdf]

Supplementary Information

# The Influence of Ionic and Nonionic Surfactants on the Colloidal Stability and Removal of CuO Nanoparticles from Water by Chemical Coagulation

Rizwan Khan <sup>1</sup>, Muhammad Ali Inam <sup>1</sup>, Sarfaraz Khan <sup>2</sup>, Andrea Navarro Jiménez <sup>2</sup>, Du Ri Park <sup>1</sup> and Ick Tae Yeom <sup>1,\*</sup>

<sup>1</sup> Graduate School of Water Resources, Sungkyunkwan University (SKKU) 2066, Suwon 16419, Korea; rizwankhan@skku.edu (R.K.); aliinam@skku.edu (M.A.I.); enfl8709@skku.edu (D.R.P.)

<sup>2</sup> Key Laboratory of the Three Gorges Reservoir Region Eco-Environment, State Ministry of Education, Chongqing University, Chongqing 400045, China; Sfk.jadoon@yahoo.com (S.K.); andrenavarrojimenez@gmail.com (A.N.J.)

\* Correspondence: yeom@skku.edu; Tel.: +82-31-299-6699

Received: 15 March 2019; Accepted: 7 April 2019; Published: date

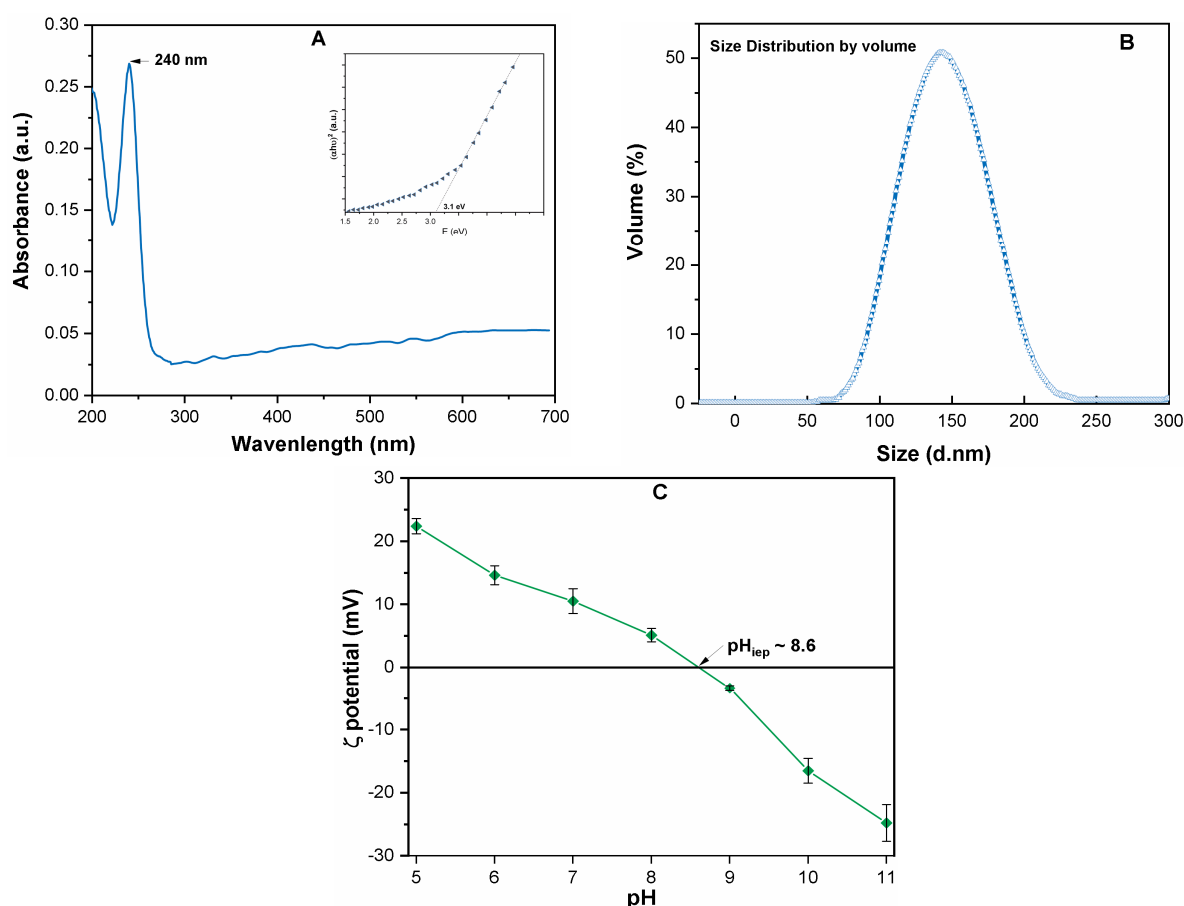

**Figure S1.** (A) UV-Vis spectra of (10 mg/L) CuO NPs in DI waters; (B) Size distribution by the intensity of CuO NPs in DI; (C)  $\zeta$  potential of CuO NPs as a function of pH.

**Table S1.** Physicochemical properties of CuO NPs used in the current study.

| Parameter                                            | Unit              | Value       |
|------------------------------------------------------|-------------------|-------------|
| Density                                              | g/cm <sup>3</sup> | 6.372       |
| Vendor-reported size                                 | nm                | <50         |
| DLS HDD measured in DI water (n = 10) see Figure S1B | Nm                | 225±38      |
| BET specific surface area measured (n = 3)           | m <sup>2</sup> /g | 29 ± 3      |
| pH <sub>iep</sub> see Figure S1C                     |                   | 8.6         |
| Zeta potential in DI water (pH = 7)                  | (mV)              | +12.5 ± 1.6 |
| Purity by ICP-MS                                     | wt %              | 98.81       |
| Moisture content by TGA                              | wt %              | 1.15        |

**Table S2.** Properties of surfactants used in the present study.

| Surfactant Type    | Molecular weight (g/mol) | Chemical Structure                                                                | Formula                                                                                                          |
|--------------------|--------------------------|-----------------------------------------------------------------------------------|------------------------------------------------------------------------------------------------------------------|
| SLS<br>(Anionic)   | 288.38                   | 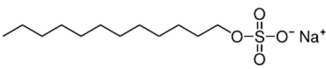 | CH <sub>3</sub> (CH <sub>2</sub> ) <sub>11</sub> OSO <sub>3</sub> Na                                             |
| NP-9<br>(Nonionic) | 616.82                   |  | C <sub>9</sub> H <sub>19</sub> C <sub>6</sub> H <sub>4</sub> (OCH <sub>2</sub> CH <sub>2</sub> ) <sub>n</sub> OH |

## Materials and methods

### 1.1. Synthetic water preparation

The synthetic freshwater and domestic wastewater were prepared in the DI water according to previously described methods [1–4]. All salts used were ACS reagent grade and purchased from local suppliers. Before use all waters were filtered through 0.45 µm glass fiber filter and stored in the dark at 4 °C.

**Table S3.** Natural and synthetic water characteristic.

| Parameter                     | Unit                    | Tap water | Fresh water | Industrial Wastewater | Domestic Wastewater |
|-------------------------------|-------------------------|-----------|-------------|-----------------------|---------------------|
| pH <sup>a</sup>               | -                       | 7.02      | 6.90        | 7.56                  | 7.81                |
| Conductivity <sup>a</sup>     | us/cm                   | 82.42     | 119         | 619                   | 2280                |
| IS                            | mM/L                    | 0.002     | 0.79        | 8.90                  | 34.0                |
| TOC                           | mg/L                    | ND        | 4.5         | 35                    | 25                  |
| HCO <sub>3</sub>              | mg CaCO <sub>3</sub> /L | >80       | 12          | -                     | 56                  |
| PO <sub>4</sub>               | mg/L                    | -         | 0.64        | ND                    | 2.71                |
| Na <sup>+</sup>               | mg/L                    | 0.31      | 0           | 15.0                  | 325.3               |
| K <sup>+</sup>                | mg/L                    | 0.06      | 1.20        | 7.53                  | 38.59               |
| Cu                            | mg/L                    | -         | 0           | 0.39                  | 0.08                |
| Fe                            | mg/L                    | -         | 0           | ND                    | 0.35                |
| Mg <sup>2+</sup>              | mg/L                    | 0.19      | 3.49        | 27.1                  | 77.0                |
| As                            | mg/L                    | -         | 0           | 68.52                 | 0                   |
| Ca <sup>2+</sup>              | mg/L                    | 0.81      | 1.50        | 16.11                 | 119.90              |
| Cl <sup>-</sup>               | mg/L                    | 0.24      | 6.61        | 22.40                 | 501                 |
| SO <sub>4</sub> <sup>2-</sup> | mg/L                    | -         | 0           | 10.52                 | 310                 |
| Sb                            | mg/L                    | -         | 0           | 58.77                 | 0                   |

–: Not Measured, ND = Not detected, <sup>a</sup> Measured in lab.

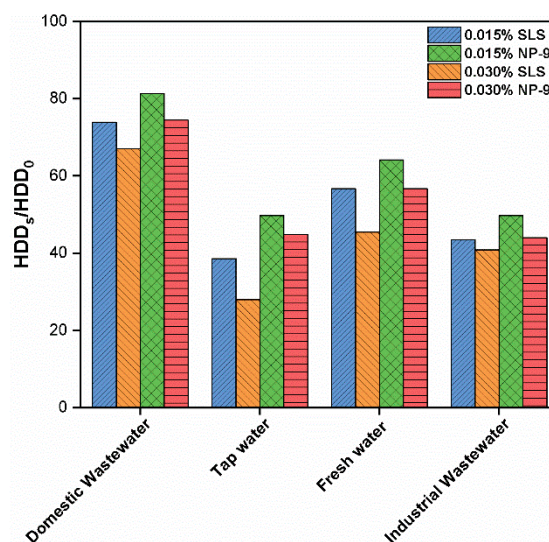

**Figure S2.** Size ratio of CuO NPs with and without surfactant in various environmental waters.

## References

1. Dickson, A.G. Thermodynamics of the dissociation of boric acid in synthetic seawater from 273.15 to 318.15 K. *Deep Sea Res. Part A. Oceanogr. Res. Pap.* **1990**, *37*, 755–766.
2. Marine Biological Laboratory (Woods Hole, M.; Cavanaugh, G.M. *Formulae and methods IV [i.e., 4th ed.] of the Marine Biological Laboratory Chemical Room.* ; Woods Hole, Mass., 1956;
3. Schnabel, W.E.; Dietz, A.C.; Burken, J.G.; Schnoor, J.L.; Alvarez, P.J. Uptake and transformation of trichloroethylene by edible garden plants. *Water Res.* **1997**, *31*, 816–824.
4. United States Environmental Protection Agency Short-term Methods for Estimating the Chronic Toxicity of Effluents and Receiving Waters to Freshwater Organisms Fourth Edition October 2002. **2002**, 1–350.

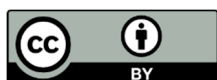

© 2019 by the authors. Submitted for possible open access publication under the terms and conditions of the Creative Commons Attribution (CC BY) license (<http://creativecommons.org/licenses/by/4.0/>).
